# Supplementary material for: Regeneration of atomic Ag sites over commercial γ-aluminas by oxidative dispersion of Ag metal particles
Source: Royal Society of Chemistry journal article supplement (doi:10.1039/d2cy01950g), 2023-01-01
Supplement: d2cy01950g1.pdf [file d2cy01950g1.pdf]

Supplementary Information

## **Regeneration of Atomic Ag Sites over Commercial $\gamma$ -Aluminas by Oxidative Dispersion of Ag Metal Particles**

Hiroe Kubota,<sup>a</sup> Shinya Mine,<sup>a</sup> Takashi Toyao,<sup>a</sup> and Ken-ichi Shimizu\*<sup>a</sup>

<sup>a</sup>Institute for Catalysis, Hokkaido University, N-21, W-10, Sapporo 001-0021, Japan

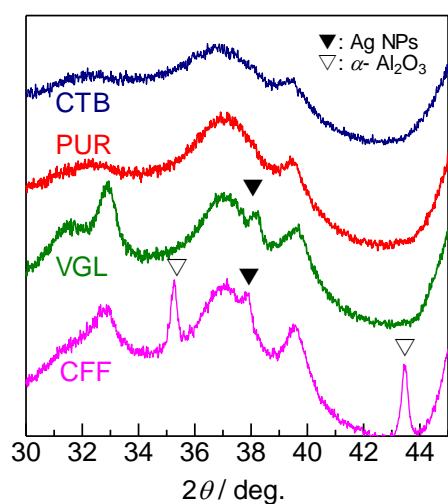

Figure S1 XRD patterns of the fresh 4 samples (Ag(3)/Al<sub>2</sub>O<sub>3</sub>) after calcination at 600 °C

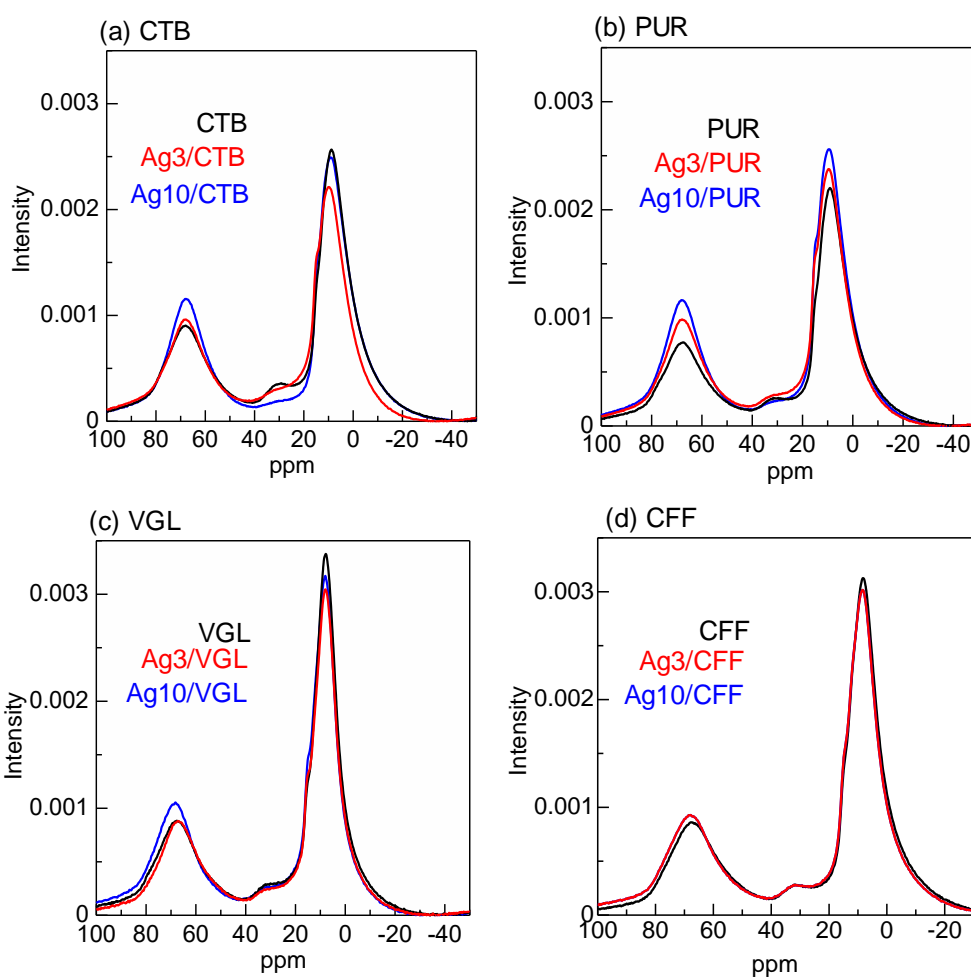

Figure S2 <sup>27</sup>Al NMR spectra of Ag(0, 3, 10 wt%)-loaded Al<sub>2</sub>O<sub>3</sub>: (a) CTB, (b) PUR, (c) VGL and (d) CFF. The samples were dehydrated under N<sub>2</sub> at 500 °C before the measurements.

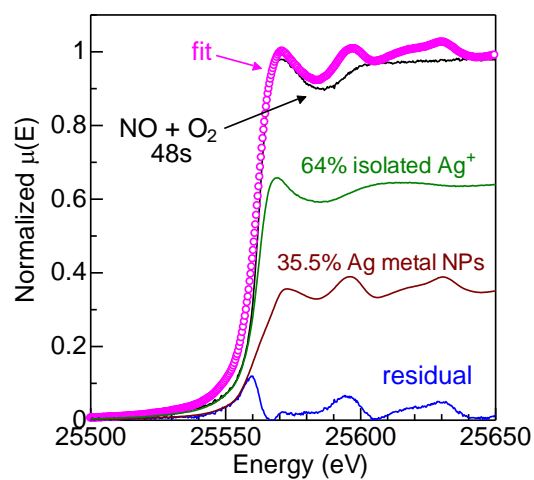

Figure S3 Example of LCF analysis.

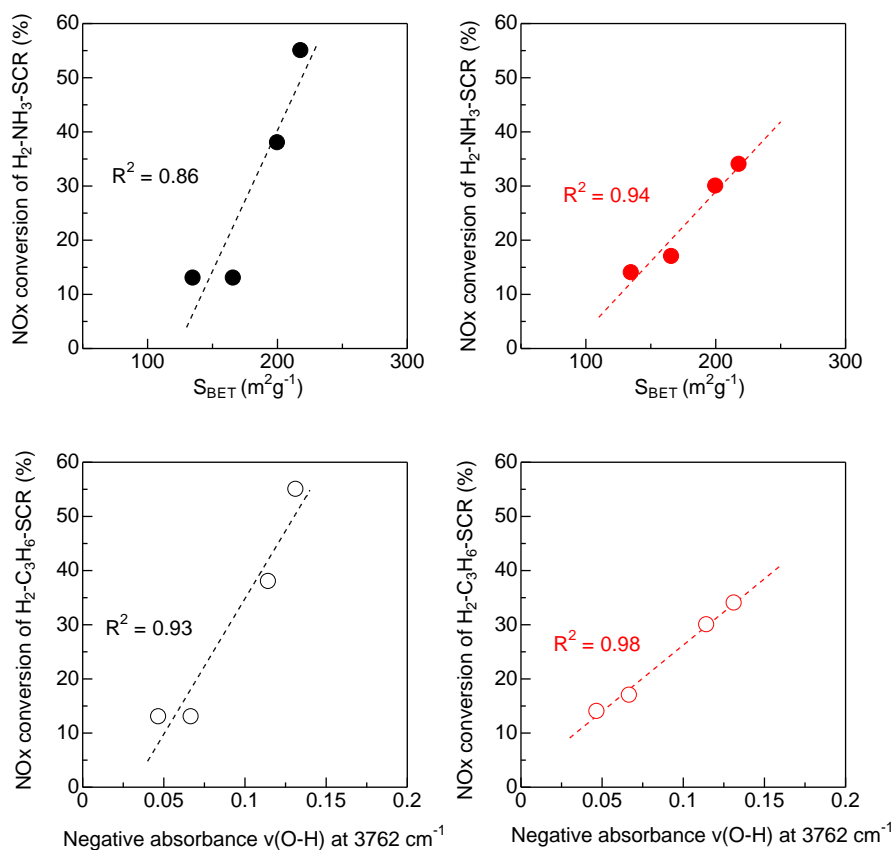

Figure S4 NO<sub>x</sub> conversions versus surface areas and IR intensity of negative peak due to HO-μ<sup>1</sup>-Al<sub>M</sub> sites (Figure 3a) for the four Ag/Al<sub>2</sub>O<sub>3</sub> catalysts.
